# Supplementary material for: A new luminol chemiluminescence sensor for glucose based on pH-dependent graphene oxide
Source: Royal Society of Chemistry journal article supplement (doi:10.1039/c3an00451a), 2013-01-01
Supplement: c3an00451a.pdf [file c3an00451a.pdf]

## Supplementary materials

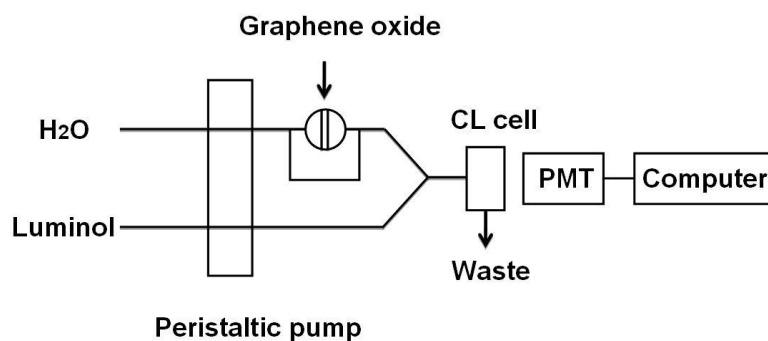

Figure S1. Schematic diagram of flow-injection chemiluminescence detection system.

PMT: photomultiplier tube.

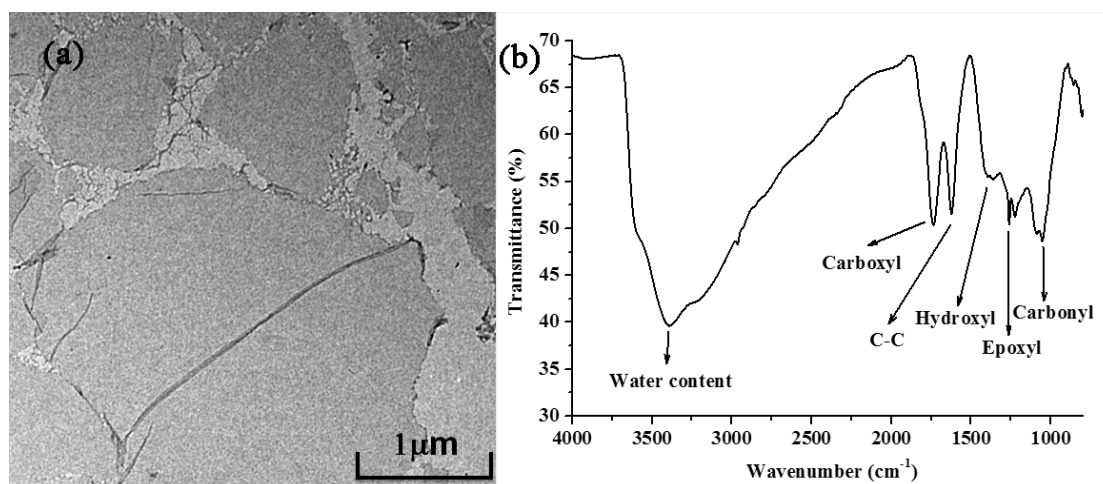

Figure S2. (a) TEM image of GO nanostructures. (b) FTIR spectra of GO nanostructures.

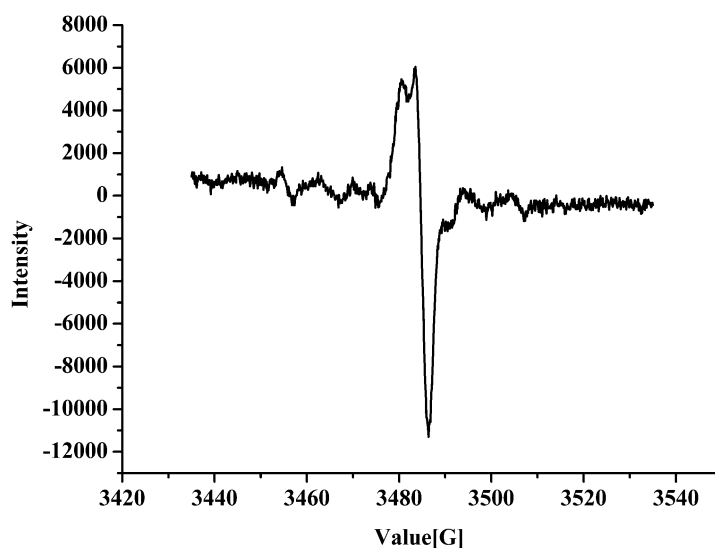

**Figure S3. ESR spectrum of GO reacted with Luminol.**

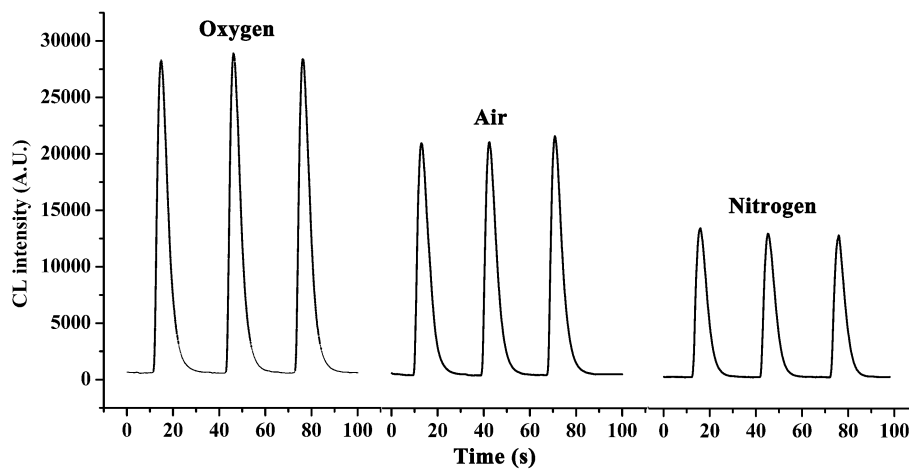

**Figure S4. Effect of nitrogen and oxygen on the CL intensity. Condition:  $7.5 \times 10^{-5}$  M luminol in 0.1M NaOH.**

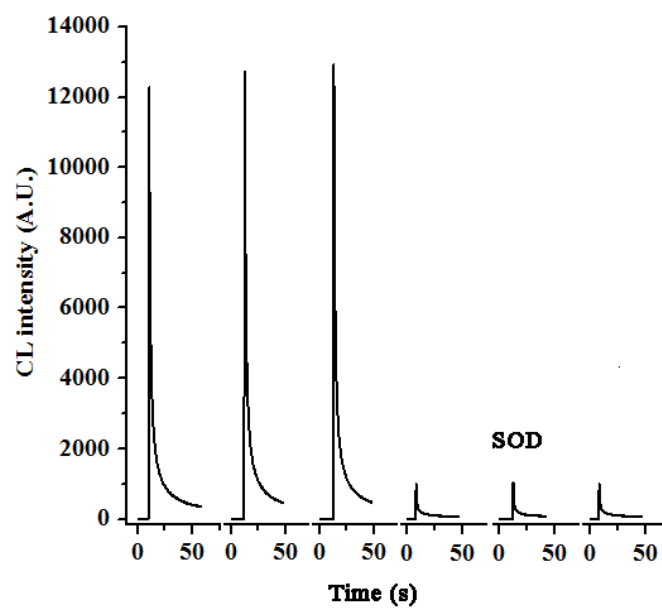

**Figure S5. CL responses before and after addition of SOD. Conditions: luminol,  $7.5 \times 10^{-5}$  M in 0.1M NaOH; GO,  $1 \text{ mg mL}^{-1}$ ; SOD,  $2 \text{ mg mL}^{-1}$ .**
